# Supplementary material for: Effects of Genetic Mutation Sites in ADR Genes on Modern Chickens Produced and Domesticated by Artificial Selection
Source: MDPI journal article supplement (doi:10.3390/biology12020169), 2023-01-20
Supplement: s1 [file s1]

Table S1: List of primers for the nine ADR gene sequences.

| Gene Name    | Primer No. | Forward                         | Primer No. | Reverse                        |
|--------------|------------|---------------------------------|------------|--------------------------------|
| ADR A1A Ex1  | F437       | TGGTGGCTATTAGCTGTGCTAGA         | R1767      | TTCCCTTTGAACCAGACCTGCTTG       |
| ADR A1A Ex2  | F3         | AGGCTTCGAGTCATAAATTTCCCA        | R758       | TATTTGTTTCATCCCAACCCCTTCA      |
| ADR A1B Ex1  | F35        | AACTGAACTCAACCATCTGCGTGTT       | R1209      | TTCACTTCCCACCCTTTCATCTGGT      |
| ADR A1B Ex2  | F57        | AATTGAAAGCAGCACATGTTAGGGA       | R2188      | TGGCTTCCTTCTAGTGGCATACTG       |
| ADR A1D Ex1  | F9         | GCTGGGAGATCACTCCATCCCTACT       | R1291      | TCACTGCTGGTTTCTTGACCGATCT      |
| ADR A1D Ex2  | F20        | ACACTAAGGAAGCTCCCACACCT         | R389       | GGTAGCCTTTGGAAGGGCTGAATCC      |
| ADR A1D Ex3  | F40        | TGGCTGTCCACCAGCCTTGCTACAC       | R2307      | AATCTGCCTGACAGACCCACAGA        |
| ADR A2A_1    | F102       | TAGGAGCGCGGAGGTCCGCGGAGA        | R1636      | TCACAAGCTGAAGGAAACCATCCCAT     |
| ADR A2A_2    | F502       | ACATCCTGGTGGCCACGCTGGTCAT       | R1215      | TGGGCAAAGTGTCCCCAGGCTTAAT      |
| ADR A2B_1    | F238       | AGTGCCCCAATAACCACGGTGGAAGCT     | R904       | GCAGGATGAGGACGGCCACCAGGAT      |
| ADR A2B_2    | F880       | ATCCTGGTGGCCGTCTCATCCTGC        | R1793      | CGCTTCTGGAAGTACCTTGACTTCA      |
| ADR A2C      | F9         | TCCGCGGGGCTCTGTAGGACGGCG        | R1463      | GCACAGAGCCTTTCCTTCCATTTTAA     |
| ADR B1_1     | F888       | AACGCCGTGCGCTGCACACCGAGGAGG     | R2618      | TGGGCTTCCTGTTTGCCTTAGGTTC      |
| ADR B1_2     | Ex2_Ex3_F  | GCAATAAATGGGCCGTGTTTATATTAA     | Ex2_Ex3_R  | TAACACGGATCTATTTACAGTACCTTC    |
| ADR B1_3     | F_END1     | TGAGTTGTTGTGCTTATCTCTTTGGCCA    | R_END2     | AACCTCCATTTCACTTTTAATTTGCGTG   |
| ADR B1_4     | 0609_F     | GGGAGTTAATGAGCCTTCTGCAGCTTGTTTC | 0609_R     | GTGTGTGGACGTGTGCAAGTAGCATCTTCA |
| ADR B1_5     | 1270_F     | ATGAGCCTTCTGCAGCTTGTTTCG        | 1270_R     | TGCGTGTGTGGACATGTGCAAGTAG      |
| ADR B2       | F1         | ACCTGCTGTCCCCTATGCGCGGA         | R2         | GCCATTGGGGTTTAGGTGTGCT         |
| ADR B3 Ex1_1 | F757       | TGCAGCCTCGACGGCGGCGGCCGC        | R1859      | AGCACAGCAGCTTGCGGAAAGCGCT      |
| ADR B3 Ex1_2 | F1478      | TCCACCATCTCCTTCTACGTGCC         | R2216      | GCCCGCTCACCAGCTCTGCATTCA       |
| ADR B3 Ex2   | F2443      | TACTGGGCCACCAGGAGTGTGTTC        | R2704      | CTGCTGCAGGGACAGGGGTGGCCC       |

**Table S2. Accession number of nine adrenergic receptors of wild birds.**

|                                                                                                                   |
|-------------------------------------------------------------------------------------------------------------------|
| ADRB1 :                                                                                                           |
| XM 015867370.2 PREDICTED: Coturnix japonica adrenoceptor beta 1 (ADRB1) mRNA                                      |
| NM 001303175.1 Meleagris gallopavo adrenoceptor beta 1 (ADRB1) mRNA                                               |
| XM 021400335.1 PREDICTED: Numida meleagris adrenoceptor beta 1 (ADRB1) mRNA                                       |
| XM 031597451.1 PREDICTED: Phasianus colchicus adrenoceptor beta 1 (ADRB1) mRNA                                    |
| LC720796.1 Gallus gallus gallus 222 ADRB1 beta-1 adrenergic receptor, complete cds                                |
| ADRA1B:                                                                                                           |
| XM 015876066.2:479-2002 PREDICTED: Coturnix japonica adrenoceptor alpha 1B (ADRA1B) mRNA                          |
| XM 003210292.4:490-2013 PREDICTED: Meleagris gallopavo adrenoceptor alpha 1B (ADRA1B) mRNA                        |
| XM 021410804.1:545-2068 PREDICTED: Numida meleagris adrenoceptor alpha 1B (ADRA1B) mRNA                           |
| XM 031598056.1:475-1998 PREDICTED: Phasianus colchicus adrenoceptor alpha 1B (ADRA1B) mRNA                        |
| LC720797.1 Gallus gallus gallus 222 ADRA1b alpha-1B adrenergic receptor, complete cds                             |
| ADRB3:                                                                                                            |
| XM 015883180.2:19-1405 PREDICTED: Coturnix japonica adrenoceptor beta 3 (ADRB3) mRNA                              |
| NM 001303183.1:112-1337 Meleagris gallopavo adrenoceptor beta 3 (ADRB3) mRNA                                      |
| XM 021374766.1:1-1367 PREDICTED: Numida meleagris adrenoceptor beta 3 (ADRB3) mRNA                                |
| XM 031602247.1:136-1363 PREDICTED: Phasianus colchicus adrenoceptor beta 3 (ADRB3) mRNA                           |
| LC720801.1 Gallus gallus gallus 222 ADRB3 beta-3 adrenergic receptor, complete cds                                |
| ADRB2:                                                                                                            |
| XM 015876329.1 PREDICTED: Coturnix japonica adrenoceptor beta 2 (ADRB2) mRNA                                      |
| XM 010719047.2:1-1185 PREDICTED: Meleagris gallopavo adrenoceptor beta 2 (ADRB2) partial mRNA                     |
| XM 021410489.1 PREDICTED: Numida meleagris adrenoceptor beta 2 (ADRB2) mRNA                                       |
| XM 031598089.1:217-1425 PREDICTED: Phasianus colchicus adrenoceptor beta 2 (ADRB2) mRNA                           |
| LC720802.1 Gallus gallus gallus 222 ADRB2 beta-2 adrenergic receptor, complete cds                                |
| ADRA2B:                                                                                                           |
| XM 015876372.2:198-1692 PREDICTED: Coturnix japonica alpha-2C adrenergic receptor-like (LOC107320469) mRNA        |
| XM 010718981.3:2-1484 PREDICTED: Meleagris gallopavo alpha-2Da adrenergic receptor-like (LOC100550610) mRNA       |
| XM 021410469.1:1-1419 PREDICTED: Numida meleagris alpha-2Db adrenergic receptor-like (LOC110405283) mRNA          |
| XM 031597911.1:1-1408 PREDICTED: Phasianus colchicus alpha-2Da adrenergic receptor-like (LOC116231902) mRNA       |
| LC720804.1 Gallus gallus gallus 222 ADRA2b alpha-2B adrenergic receptor, complete cds                             |
| ADRA1A:                                                                                                           |
| XM 032448889.1 PREDICTED: Coturnix japonica adrenoceptor alpha 1A (ADRA1A) transcript variant X3 mRNA             |
| XM 010723203.2 PREDICTED: Meleagris gallopavo adrenoceptor alpha 1A (ADRA1A) mRNA                                 |
| XM 021375050.1 PREDICTED: Numida meleagris adrenoceptor alpha 1A (ADRA1A) mRNA                                    |
| XM 031596973.1 PREDICTED: Phasianus colchicus adrenoceptor alpha 1A (ADRA1A) mRNA                                 |
| LC720799.1 Gallus gallus gallus 222 ADRA1A alpha-1A adrenergic receptor, complete cds                             |
| ADRA1B:                                                                                                           |
| XM 015876066.2:479-2002 PREDICTED: Coturnix japonica adrenoceptor alpha 1B (ADRA1B) mRNA                          |
| XM 003210292.4:490-2013 PREDICTED: Meleagris gallopavo adrenoceptor alpha 1B (ADRA1B) mRNA                        |
| XM 021410804.1:545-2068 PREDICTED: Numida meleagris adrenoceptor alpha 1B (ADRA1B) mRNA                           |
| XM 031598056.1:475-1998 PREDICTED: Phasianus colchicus adrenoceptor alpha 1B (ADRA1B) mRNA                        |
| LC720797.1 Gallus gallus gallus 222 ADRA1b alpha-1B adrenergic receptor, complete cd                              |
| ADRA1D:                                                                                                           |
| XM 015863039.2:391-2000 PREDICTED: Coturnix japonica adrenoceptor alpha 1D (ADRA1D) transcript variant X1 mRNA    |
| XR 793488.3:385-1993 PREDICTED: Meleagris gallopavo adrenoceptor alpha 1D (ADRA1D) transcript variant X2 misc RNA |
| XM 021396914.1:361-1969 PREDICTED: Numida meleagris adrenoceptor alpha 1D (ADRA1D) mRNA                           |
| XM 031588716.1:159-1767 PREDICTED: Phasianus colchicus adrenoceptor alpha 1D (ADRA1D) mRNA                        |
| LC720798.1 Gallus gallus gallus 222 ADRA1D alpha-1D adrenergic receptor, complete cds                             |
| ADRA2A:                                                                                                           |
| XM 032445492.1 PREDICTED: Coturnix japonica adrenoceptor alpha 2A (ADRA2A) mRNA                                   |
| XM 010714708.3 PREDICTED: Meleagris gallopavo adrenoceptor alpha 2A (ADRA2A) mRNA                                 |
| XM 021399617.1 PREDICTED: Numida meleagris adrenoceptor alpha 2A (ADRA2A) mRNA                                    |
| XM 031597481.1 PREDICTED: Phasianus colchicus adrenoceptor alpha 2A (ADRA2A) mRNA                                 |
| LC720800.1 Gallus gallus gallus 222 ADRA2a alpha-2A adrenergic receptor, complete cds                             |

Table S3. The DNA and amino acid mutation sits of ADR genes from breeds.

| GeneName |               | Shaver Brown |            |        |        |            |         |        |            |         | Shamo  |            |         |        |            |         |        |                |         |
|----------|---------------|--------------|------------|--------|--------|------------|---------|--------|------------|---------|--------|------------|---------|--------|------------|---------|--------|----------------|---------|
|          |               | N5           | N5         | N5     | N6     | N6         | N6      | N7     | N7         | N7      | S6     | S6         | S6      | S7     | S7         | S7      | S9     | S9             | S9      |
|          |               | DNA          | Amino Acid | TMHMM  | DNA    | Amino Acid | TMHMM   | DNA    | Amino Acid | TMHMM   | DNA    | Amino Acid | TMHMM   | DNA    | Amino Acid | TMHMM   | DNA    | Amino Acid     | TMHMM   |
| 1        | ADR α1A exon1 | —            | —          |        | —      | —          |         | —      | —          |         | —      | —          |         | —      | —          |         | —      | —              |         |
| 2        | ADR α1A exon2 | A1093R       | S365G      | inside | A1093R | S365G      | inside  | A1093R | S365G      | inside  | —      | —          |         | —      | —          |         | —      | —              |         |
| 3        | ADR α1B exon1 |              | —          |        | G773R  | R258Q      | inside  |        | —          |         | —      | —          |         | —      | —          |         | —      | —              |         |
| 4        | ADR α1B exon2 |              | —          |        |        |            |         | G1480A | V494M      | inside  | —      | —          |         | —      | —          |         | —      | —              |         |
| 5        | ADR α1D exon1 | —            | —          |        | —      | —          |         | —      | —          |         | —      | —          |         | T173K  | L58W       | Tmhelix | —      | —              |         |
| 6        | ADR α1D exon2 | —            | —          |        |        |            |         | —      | —          |         | C1319M | T440N      | inside  | C1319M | T440N      | inside  | C1319M | T440N (C1319M) | inside  |
| 7        | ADR α2A       | —            | —          |        | G172R  | V58I       | outside | G172R  | V58I       | outside | G172A  | V58I       | outside | G172A  | V58I       | outside | G172R  | V58I           | outside |
| 8        |               | —            | —          |        | C819M  | D273E      | inside  |        |            |         | C819M  | D273E      | inside  | C819M  | D273E      | inside  | —      | —              |         |
| 9        | ADR α2A       | —            | —          |        |        |            |         | —      |            |         | —      | —          |         |        | —          |         | G886R  | V296I          | inside  |
| 10       | ADR α2B       | —            | —          |        | —      | —          |         | —      | —          |         | G413R  | R138Q      | inside  | —      | —          |         | —      | —              |         |
| 11       |               |              |            |        |        |            |         |        |            |         | G629R  | R210H      | inside  |        |            |         |        |                |         |
| 12       | ADR α2B       | —            | —          |        | —      | —          |         | —      | —          |         | —      | —          |         | G874R  | V292M      | outside | G874R  | V292M          | outside |
| 13       | ADR α2C       | —            | —          |        | —      | —          |         | —      | —          |         | —      | —          |         | —      | —          |         | —      | —              |         |
| 14       | ADR β1        | G1208A       | R403Q      | inside | —      | —          |         | —      | —          |         | G1208A | R403Q      | inside  | G1208A | R403Q      | inside  | G1208A | R403Q          | inside  |
| 15       | ADR β1        | —            | —          |        | —      | —          |         | —      | —          |         | G1328R | N443S      | inside  | G1328R | N443S      | inside  | G1328R | N443S          | inside  |
| 17       |               | —            | —          |        | —      | —          |         | —      | —          |         | G1334R | S445N      | inside  | G1334R | S445N      | inside  | G1334A | S445N          | inside  |
| 18       |               | —            | —          |        | —      | —          |         | —      | —          |         | C1396Y | R466C      | inside  | C1396Y | R466C      | inside  | C1396T | R466C          | inside  |
| 16       | ADR β1        | —            | —          |        | G1330R | G444S      | inside  | —      | —          |         | —      | —          |         | —      | —          |         | —      | —              |         |
| 19       | ADR β2        | —            | —          |        | —      | —          |         | —      | —          |         | —      | —          |         | G43R   | A15T       | outside | G43R   | A15T           | outside |
| 20       | ADR β2        | —            | —          |        | —      | —          |         | —      | —          |         | —      | —          |         | C131Y  | T44I       | Tmhelix | C131Y  | T44I           | Tmhelix |
| 21       |               | —            | —          |        | —      | —          |         | —      | —          |         | —      | —          |         | T132Y  | T44I       | Tmhelix | T132Y  | T44I           | Tmhelix |
| 22       |               | —            | —          |        | —      | —          |         | —      | —          |         | —      | —          |         | A695R  | Q232R      | inside  | A695R  | Q232R          | inside  |
| 23       |               | —            | —          |        | —      | —          |         | —      | —          |         | C830Y  | T277M      | Tmhelix | —      | —          |         | —      | —              |         |
| 24       | ADR β3        | C1024Y       | R342C      | inside | C1024Y | R342C      | inside  | C1024Y | R342C      | inside  | C1024Y | R342C      | inside  | C1024Y | R342C      | TMhelix | C1024Y | R342C          | inside  |
| 25       |               | T1186Y       | S396P      | inside | T1186Y | S396P      | inside  | T1186Y | S396P      | inside  | T1186Y | S396P      | inside  | T1186Y | S396P      | inside  | T1186Y | S396P          | inside  |
| 26       |               | A1211W       | Q404L      | inside | A1211W | Q404L      | inside  | A1211W | Q404L      | inside  | A1211W | Q404L      | inside  | A1211W | Q404L      | inside  | A1211W | Q404L          | inside  |
| 27       |               | C1218M       | P406S      | inside | C1218M | P406S      | inside  | C1218M | P406S      | inside  | C1218M | P406S      | inside  | C1218M | P406S      | inside  | C1218M | P406S          | inside  |

Orange indicates Shaver Brown-specific mutations, whereas blue indicates Shamo-specific mutations. Green indicates mutations common to both breeds. No color indicates external mutations.

**Table S4. The protein subcellular localization prediction of nine ADR genes.**

| <b>alpha-1A adrenergic receptor [Gallus gallus]    GenBank: BBK26311.1</b> |      |          |                  |                                                                                                                 |
|----------------------------------------------------------------------------|------|----------|------------------|-----------------------------------------------------------------------------------------------------------------|
| id                                                                         | site | distance | identity         | comments                                                                                                        |
| A1AA_HUMAN                                                                 | plas | 794.567  | 77.09% [Uniprot] | SWISS-PROT45:Integral membrane protein. GO:0005887; C:integral to plasma membrane; Evidence:TAS.                |
| A1AA_ORYLA                                                                 | plas | 1640.35  | 57.89% [Uniprot] | SWISS-PROT45:Integral membrane protein.                                                                         |
| O2W1_HUMAN                                                                 | plas | 2137.47  | 15.42% [Uniprot] | SWISS-PROT45:Integral membrane protein.                                                                         |
| PF2R_HUMAN                                                                 | plas | 2294.05  | 14.78% [Uniprot] | SWISS-PROT45:Integral membrane protein. GO:0005887; C:integral to plasma membrane; Evidence:TAS.                |
| EDG1_RAT                                                                   | plas | 2464.55  | 21.63% [Uniprot] | SWISS-PROT45:Integral membrane protein.                                                                         |
| P2Y5_HUMAN                                                                 | plas | 2468.16  | 17.99% [Uniprot] | SWISS-PROT45:Integral membrane protein. GO:0016021; C:integral to membrane; Evidence:NAS.                       |
| TAR1_HUMAN                                                                 | plas | 2493.26  | 22.70% [Uniprot] | SWISS-PROT45:Integral membrane protein.                                                                         |
| A1AA_RABIT                                                                 | plas | 2554.73  | 77.09% [Uniprot] | SWISS-PROT45:Integral membrane protein.                                                                         |
| <b>alpha-1B adrenergic receptor [Gallus gallus]    GenBank: BBK26315.1</b> |      |          |                  |                                                                                                                 |
| id                                                                         | site | distance | identity         | comments                                                                                                        |
| S1C1_MACFA                                                                 | plas | 8834.15  | 13.62% [Uniprot] | SWISS-PROT45:Integral membrane protein.                                                                         |
| S1C1_HUMAN                                                                 | plas | 9028.57  | 16.15% [Uniprot] | SWISS-PROT45:Integral membrane protein.                                                                         |
| ACM3_CAEEL                                                                 | plas | 9332.11  | 17.78% [Uniprot] | SWISS-PROT45:Integral membrane protein.                                                                         |
| 5HT_LYMST                                                                  | plas | 9385.45  | 24.50% [Uniprot] | SWISS-PROT45:Integral membrane protein.                                                                         |
| ACM3_RAT                                                                   | plas | 9925.55  | 19.19% [Uniprot] | SWISS-PROT45:Integral membrane protein.                                                                         |
| ACM3_MOUSE                                                                 | plas | 9934.19  | 19.19% [Uniprot] | SWISS-PROT45:Integral membrane protein.                                                                         |
| D2DR_DROME                                                                 | plas | 10371.4  | 22.28% [Uniprot] | SWISS-PROT45:Integral membrane protein.                                                                         |
| <b>alpha-1D adrenergic receptor [Gallus gallus]    GenBank: BBK26322.1</b> |      |          |                  |                                                                                                                 |
| id                                                                         | site | distance | identity         | comments                                                                                                        |
| NY5R_CANFA                                                                 | plas | 960.224  | 17.61% [Uniprot] | SWISS-PROT45:Integral membrane protein.                                                                         |
| ACM3_RAT                                                                   | plas | 970.06   | 20.37% [Uniprot] | SWISS-PROT45:Integral membrane protein.                                                                         |
| NY5R_RAT                                                                   | plas | 1050.43  | 17.35% [Uniprot] | SWISS-PROT45:Integral membrane protein.                                                                         |
| ACM3_MOUSE                                                                 | plas | 1072.92  | 20.54% [Uniprot] | SWISS-PROT45:Integral membrane protein.                                                                         |
| NY5R_PIG                                                                   | plas | 1245.66  | 16.24% [Uniprot] | SWISS-PROT45:Integral membrane protein.                                                                         |
| NY5R_HUMAN                                                                 | plas | 1294.31  | 16.96% [Uniprot] | SWISS-PROT45:Integral membrane protein. GO:0005887; C:integral to plasma membrane; Evidence:TAS.                |
| NY5R_MOUSE                                                                 | plas | 1349.92  | 18.20% [Uniprot] | SWISS-PROT45:Integral membrane protein. GO:0016020; C:membrane; Evidence:IDA.                                   |
| ACM3_GORGO                                                                 | plas | 1381.89  | 20.68% [Uniprot] | SWISS-PROT45:Integral membrane protein.                                                                         |
| <b>alpha-2A adrenergic receptor [Gallus gallus]    GenBank: BBK26327.2</b> |      |          |                  |                                                                                                                 |
| id                                                                         | site | distance | identity         | comments                                                                                                        |
| IRKF_CAVPO                                                                 | plas | 1142.91  | 14.61% [Uniprot] | SWISS-PROT45:Integral membrane protein.                                                                         |
| CLT1_MOUSE                                                                 | plas | 1390.73  | 15.09% [Uniprot] | SWISS-PROT45:Integral membrane protein. GO:0005887; C:integral to plasma membrane; Evidence:IDA.                |
| A1A4_MOUSE                                                                 | plas | 1640.41  | 12.21% [Uniprot] | SWISS-PROT45:Integral membrane protein. GO:0005890; C:sodium/potassium-exchanging ATPase complex; Evidence:ISS. |
| 5H7_XENLA                                                                  | plas | 1656.39  | 22.93% [Uniprot] | SWISS-PROT45:Integral membrane protein.                                                                         |
| A8B4_HUMAN                                                                 | plas | 1703.75  | 11.24% [Uniprot] | SWISS-PROT45:Integral membrane protein.                                                                         |
| A1A4_RAT                                                                   | plas | 1850.33  | 11.67% [Uniprot] | SWISS-PROT45:Integral membrane protein. GO:0005890; C:sodium/potassium-exchanging ATPase complex; Evidence:ISS. |
| CCAM_MUSDO                                                                 | plas | 2256.16  | 8.18% [Uniprot]  | SWISS-PROT45:Integral membrane protein.                                                                         |
| IRK5_RAT                                                                   | plas | 2256.49  | 12.16% [Uniprot] | SWISS-PROT45:Integral membrane protein.                                                                         |
| <b>alpha-2B adrenergic receptor [Gallus gallus]    GenBank: BBK26332.1</b> |      |          |                  |                                                                                                                 |
| id                                                                         | site | distance | identity         | comments                                                                                                        |
| SSR5_RAT                                                                   | plas | 589.81   | 21.04% [Uniprot] | SWISS-PROT45:Integral membrane protein.                                                                         |
| SSR5_MOUSE                                                                 | plas | 776.474  | 22.13% [Uniprot] | SWISS-PROT45:Integral membrane protein.                                                                         |
| D3DR_CERAE                                                                 | plas | 871.177  | 32.19% [Uniprot] | SWISS-PROT45:Integral membrane protein.                                                                         |
| D3DR_HUMAN                                                                 | plas | 920.785  | 32.43% [Uniprot] | SWISS-PROT45:Integral membrane protein. GO:0005887; C:integral to plasma membrane; Evidence:TAS.                |
| GALS_HUMAN                                                                 | plas | 1234.47  | 22.56% [Uniprot] | SWISS-PROT45:Integral membrane protein. GO:0005886; C:plasma membrane; Evidence:TAS.                            |
| PE21_HUMAN                                                                 | plas | 1942.69  | 19.35% [Uniprot] | SWISS-PROT45:Integral membrane protein. GO:0005887; C:integral to plasma membrane; Evidence:TAS.                |
| D3DR_MOUSE                                                                 | plas | 2128.75  | 28.26% [Uniprot] | SWISS-PROT45:Integral membrane protein.                                                                         |
| D3DR_RAT                                                                   | plas | 2175.3   | 29.36% [Uniprot] | SWISS-PROT45:Integral membrane protein.                                                                         |
| <b>alpha-2C adrenergic receptor [Gallus gallus]    GenBank: BBK26341.1</b> |      |          |                  |                                                                                                                 |
| id                                                                         | site | distance | identity         | comments                                                                                                        |
| A1AA_BOVIN                                                                 | plas | 1973.97  | 24.74% [Uniprot] | SWISS-PROT45:Integral membrane protein.                                                                         |
| A1AA_CAVPO                                                                 | plas | 2075.26  | 23.92% [Uniprot] | SWISS-PROT45:Integral membrane protein.                                                                         |
| A1AA_RABIT                                                                 | plas | 2172.32  | 24.95% [Uniprot] | SWISS-PROT45:Integral membrane protein.                                                                         |
| CCKR_XENLA                                                                 | plas | 2578.6   | 17.72% [Uniprot] | SWISS-PROT45:Integral membrane protein.                                                                         |
| P2YC_MOUSE                                                                 | plas | 2821.8   | 14.77% [Uniprot] | SWISS-PROT45:Integral membrane protein. GO:0005887; C:integral to plasma membrane; IC.                          |
| PE24_RABIT                                                                 | plas | 2902.42  | 13.70% [Uniprot] | SWISS-PROT45:Integral membrane protein.                                                                         |
| OPN4_MOUSE                                                                 | plas | 2953.32  | 19.00% [Uniprot] | SWISS-PROT45:Integral membrane protein.                                                                         |
| PE24_RAT                                                                   | plas | 3064.75  | 12.91% [Uniprot] | SWISS-PROT45:Integral membrane protein.                                                                         |
| <b>beta-1 adrenergic receptor [Gallus gallus]    GenBank: BBK26345.2</b>   |      |          |                  |                                                                                                                 |
| id                                                                         | site | distance | identity         | comments                                                                                                        |
| B1AR_MELGA                                                                 | plas | 107.217  | 94.20% [Uniprot] | SWISS-PROT45:Integral membrane protein.                                                                         |
| A2AA_PIG                                                                   | plas | 786.115  | 24.69% [Uniprot] | SWISS-PROT45:Integral membrane protein.                                                                         |
| A2AA_HUMAN                                                                 | plas | 942.004  | 24.11% [Uniprot] | SWISS-PROT45:Integral membrane protein. GO:0005887; C:integral to plasma membrane; Evidence:TAS.                |
| A2AA_MOUSE                                                                 | plas | 986.248  | 24.43% [Uniprot] | SWISS-PROT45:Integral membrane protein.                                                                         |
| A2AA_RAT                                                                   | plas | 998.854  | 24.84% [Uniprot] | SWISS-PROT45:Integral membrane protein.                                                                         |
| CML2_HUMAN                                                                 | plas | 1121.49  | 15.72% [Uniprot] | SWISS-PROT45:Integral membrane protein. GO:0005887; C:integral to plasma membrane; Evidence:TAS.                |
| A2AA_CAVPO                                                                 | plas | 1137.09  | 24.22% [Uniprot] | SWISS-PROT45:Integral membrane protein.                                                                         |
| A2AA_BOVIN                                                                 | plas | 1240     | 24.48% [Uniprot] | SWISS-PROT45:Integral membrane protein.                                                                         |

beta-2 adrenergic receptor [Gallus gallus]    GenBank: BBK26353.1

| id         | site | distance | identity | comments                                                                                                   |
|------------|------|----------|----------|------------------------------------------------------------------------------------------------------------|
| B2AR_MACMU | plas | 756.709  | 71.12%   | [Uniprot] SWISS-PROT45:Integral membrane protein.                                                          |
| O4S1_HUMAN | plas | 2013.5   | 16.62%   | [Uniprot] SWISS-PROT45:Integral membrane protein.                                                          |
| O2Y1_HUMAN | plas | 2331.67  | 17.38%   | [Uniprot] SWISS-PROT45:Integral membrane protein.                                                          |
| NK2R_MOUSE | plas | 2456.67  | 24.88%   | [Uniprot] SWISS-PROT45:Integral membrane protein.                                                          |
| SPR1_MOUSE | plas | 2584.04  | 19.55%   | [Uniprot] SWISS-PROT45:Integral membrane protein.                                                          |
| B2AR_FELCA | plas | 2614.15  | 72.73%   | [Uniprot] SWISS-PROT45:Integral membrane protein.                                                          |
| B2AR_HUMAN | plas | 2694.67  | 69.73%   | [Uniprot] SWISS-PROT45:Integral membrane protein. GO:0005764; C:lysosome; Evidence:TAS.                    |
| SPR1_HUMAN | plas | 2734.18  | 19.05%   | [Uniprot] SWISS-PROT45:Integral membrane protein. GO:0005887; C:integral to plasma membrane; Evidence:TAS. |

beta-3 adrenergic receptor [Gallus gallus]    GenBank: BBK26359.1

| id         | site | distance | identity | comments                                                                                                   |
|------------|------|----------|----------|------------------------------------------------------------------------------------------------------------|
| GALS_HUMAN | plas | 1739.17  | 22.45%   | [Uniprot] SWISS-PROT45:Integral membrane protein. GO:0005886; C:plasma membrane; Evidence:TAS.             |
| MSHR_GORGO | plas | 2003.14  | 21.65%   | [Uniprot] SWISS-PROT45:Integral membrane protein.                                                          |
| MSHR_HUMAN | plas | 2112.55  | 22.05%   | [Uniprot] SWISS-PROT45:Integral membrane protein. GO:0005887; C:integral to plasma membrane; Evidence:TAS. |
| DBDR_HUMAN | plas | 2204.08  | 30.27%   | [Uniprot] SWISS-PROT45:Integral membrane protein. GO:0005887; C:integral to plasma membrane; Evidence:TAS. |
| MRGF_HUMAN | plas | 2215.45  | 16.25%   | [Uniprot] SWISS-PROT45:Integral membrane protein.                                                          |
| MSHR_ALOCA | plas | 2230.97  | 22.67%   | [Uniprot] SWISS-PROT45:Integral membrane protein.                                                          |
| MSHR_PANTR | plas | 2314.4   | 21.60%   | [Uniprot] SWISS-PROT45:Integral membrane protein.                                                          |
| O4D5_HUMAN | plas | 2331.97  | 16.25%   | [Uniprot] SWISS-PROT45:Integral membrane protein.                                                          |

Table S5. Prediction of transmembrane helices in proteins of nine ADR genes.

|                                                   |                                                                  |         |     |     |  |
|---------------------------------------------------|------------------------------------------------------------------|---------|-----|-----|--|
| ADRA1A                                            | alpha-1A adrenergic receptor [Gallus gallus] GenBank: BBK26311.1 |         |     |     |  |
| # BBK26311.1 Length: 467                          |                                                                  |         |     |     |  |
| # BBK26311.1 Number of predicted TMHs: 7          |                                                                  |         |     |     |  |
| # BBK26311.1 Exp number of AAs in TMHs: 147.91708 |                                                                  |         |     |     |  |
| # BBK26311.1 Exp number, first 60 AAs: 23.36721   |                                                                  |         |     |     |  |
| # BBK26311.1 Total prob of N-in: 0.00031          |                                                                  |         |     |     |  |
| # BBK26311.1 POSSIBLE N-term signal sequence      |                                                                  |         |     |     |  |
| BBK26311.1                                        | TMHMM2.0                                                         | outside | 1   | 27  |  |
| BBK26311.1                                        | TMHMM2.0                                                         | TMhelix | 28  | 50  |  |
| BBK26311.1                                        | TMHMM2.0                                                         | inside  | 51  | 62  |  |
| BBK26311.1                                        | TMHMM2.0                                                         | TMhelix | 63  | 85  |  |
| BBK26311.1                                        | TMHMM2.0                                                         | outside | 86  | 99  |  |
| BBK26311.1                                        | TMHMM2.0                                                         | TMhelix | 100 | 122 |  |
| BBK26311.1                                        | TMHMM2.0                                                         | inside  | 123 | 142 |  |
| BBK26311.1                                        | TMHMM2.0                                                         | TMhelix | 143 | 165 |  |
| BBK26311.1                                        | TMHMM2.0                                                         | outside | 166 | 184 |  |
| BBK26311.1                                        | TMHMM2.0                                                         | TMhelix | 185 | 207 |  |
| BBK26311.1                                        | TMHMM2.0                                                         | inside  | 208 | 272 |  |
| BBK26311.1                                        | TMHMM2.0                                                         | TMhelix | 273 | 295 |  |
| BBK26311.1                                        | TMHMM2.0                                                         | outside | 296 | 309 |  |
| BBK26311.1                                        | TMHMM2.0                                                         | TMhelix | 310 | 329 |  |
| BBK26311.1                                        | TMHMM2.0                                                         | inside  | 330 | 467 |  |
| ADRA1B                                            | alpha-1B adrenergic receptor [Gallus gallus] BBK26315.1          |         |     |     |  |
| # BBK26315.1 Length: 507                          |                                                                  |         |     |     |  |
| # BBK26315.1 Number of predicted TMHs: 7          |                                                                  |         |     |     |  |
| # BBK26315.1 Exp number of AAs in TMHs: 152.7034  |                                                                  |         |     |     |  |
| # BBK26315.1 Exp number, first 60 AAs: 9.82078    |                                                                  |         |     |     |  |
| # BBK26315.1 Total prob of N-in: 0.01195          |                                                                  |         |     |     |  |
| BBK26315.1                                        | TMHMM2.0                                                         | outside | 1   | 51  |  |
| BBK26315.1                                        | TMHMM2.0                                                         | TMhelix | 52  | 74  |  |
| BBK26315.1                                        | TMHMM2.0                                                         | inside  | 75  | 85  |  |
| BBK26315.1                                        | TMHMM2.0                                                         | TMhelix | 86  | 108 |  |
| BBK26315.1                                        | TMHMM2.0                                                         | outside | 109 | 122 |  |
| BBK26315.1                                        | TMHMM2.0                                                         | TMhelix | 123 | 145 |  |
| BBK26315.1                                        | TMHMM2.0                                                         | inside  | 146 | 165 |  |
| BBK26315.1                                        | TMHMM2.0                                                         | TMhelix | 166 | 188 |  |
| BBK26315.1                                        | TMHMM2.0                                                         | outside | 189 | 207 |  |
| BBK26315.1                                        | TMHMM2.0                                                         | TMhelix | 208 | 230 |  |
| BBK26315.1                                        | TMHMM2.0                                                         | inside  | 231 | 298 |  |
| BBK26315.1                                        | TMHMM2.0                                                         | TMhelix | 299 | 321 |  |
| BBK26315.1                                        | TMHMM2.0                                                         | outside | 322 | 335 |  |
| BBK26315.1                                        | TMHMM2.0                                                         | TMhelix | 336 | 355 |  |
| BBK26315.1                                        | TMHMM2.0                                                         | inside  | 356 | 507 |  |
| ADRA1D                                            | alpha-1D adrenergic receptor [Gallus gallus] GenBank: BBK26322.1 |         |     |     |  |
| # BBK26322.1 Length: 511                          |                                                                  |         |     |     |  |
| # BBK26322.1 Number of predicted TMHs: 7          |                                                                  |         |     |     |  |
| # BBK26322.1 Exp number of AAs in TMHs: 154.20159 |                                                                  |         |     |     |  |
| # BBK26322.1 Exp number, first 60 AAs: 7.55847    |                                                                  |         |     |     |  |
| # BBK26322.1 Total prob of N-in: 0.00003          |                                                                  |         |     |     |  |
| BBK26322.1                                        | TMHMM2.0                                                         | outside | 1   | 53  |  |
| BBK26322.1                                        | TMHMM2.0                                                         | TMhelix | 54  | 76  |  |
| BBK26322.1                                        | TMHMM2.0                                                         | inside  | 77  | 87  |  |
| BBK26322.1                                        | TMHMM2.0                                                         | TMhelix | 88  | 110 |  |
| BBK26322.1                                        | TMHMM2.0                                                         | outside | 111 | 124 |  |
| BBK26322.1                                        | TMHMM2.0                                                         | TMhelix | 125 | 147 |  |
| BBK26322.1                                        | TMHMM2.0                                                         | inside  | 148 | 167 |  |
| BBK26322.1                                        | TMHMM2.0                                                         | TMhelix | 168 | 190 |  |
| BBK26322.1                                        | TMHMM2.0                                                         | outside | 191 | 209 |  |
| BBK26322.1                                        | TMHMM2.0                                                         | TMhelix | 210 | 232 |  |
| BBK26322.1                                        | TMHMM2.0                                                         | inside  | 233 | 300 |  |
| BBK26322.1                                        | TMHMM2.0                                                         | TMhelix | 301 | 323 |  |
| BBK26322.1                                        | TMHMM2.0                                                         | outside | 324 | 337 |  |
| BBK26322.1                                        | TMHMM2.0                                                         | TMhelix | 338 | 357 |  |
| BBK26322.1                                        | TMHMM2.0                                                         | inside  | 358 | 511 |  |

|                                                   |                                                                  |         |     |     |  |
|---------------------------------------------------|------------------------------------------------------------------|---------|-----|-----|--|
| ADRA2C                                            | alpha-2C adrenergic receptor [Gallus gallus] GenBank: BBK26341.1 |         |     |     |  |
| # BBK26341.1 Length: 446                          |                                                                  |         |     |     |  |
| # BBK26341.1 Number of predicted TMHs: 7          |                                                                  |         |     |     |  |
| # BBK26341.1 Exp number of AAs in TMHs: 156.20257 |                                                                  |         |     |     |  |
| # BBK26341.1 Exp number, first 60 AAs: 15.51516   |                                                                  |         |     |     |  |
| # BBK26341.1 Total prob of N-in: 0.00292          |                                                                  |         |     |     |  |
| # BBK26341.1 POSSIBLE N-term signal sequence      |                                                                  |         |     |     |  |
| BBK26341.1                                        | TMHMM2.0                                                         | outside | 1   | 45  |  |
| BBK26341.1                                        | TMHMM2.0                                                         | TMhelix | 46  | 68  |  |
| BBK26341.1                                        | TMHMM2.0                                                         | inside  | 69  | 79  |  |
| BBK26341.1                                        | TMHMM2.0                                                         | TMhelix | 80  | 102 |  |
| BBK26341.1                                        | TMHMM2.0                                                         | outside | 103 | 116 |  |
| BBK26341.1                                        | TMHMM2.0                                                         | TMhelix | 117 | 139 |  |
| BBK26341.1                                        | TMHMM2.0                                                         | inside  | 140 | 159 |  |
| BBK26341.1                                        | TMHMM2.0                                                         | TMhelix | 160 | 182 |  |
| BBK26341.1                                        | TMHMM2.0                                                         | outside | 183 | 201 |  |
| BBK26341.1                                        | TMHMM2.0                                                         | TMhelix | 202 | 224 |  |
| BBK26341.1                                        | TMHMM2.0                                                         | inside  | 225 | 362 |  |
| BBK26341.1                                        | TMHMM2.0                                                         | TMhelix | 363 | 385 |  |
| BBK26341.1                                        | TMHMM2.0                                                         | outside | 386 | 404 |  |
| BBK26341.1                                        | TMHMM2.0                                                         | TMhelix | 405 | 424 |  |
| BBK26341.1                                        | TMHMM2.0                                                         | inside  | 425 | 446 |  |
| ADRB1                                             | beta-1 adrenergic receptor [Gallus gallus] GenBank: BBK26345.2   |         |     |     |  |
| # BBK26345.2 Number of predicted TMHs: 7          |                                                                  |         |     |     |  |
| # BBK26345.2 Exp number of AAs in TMHs: 160.90505 |                                                                  |         |     |     |  |
| # BBK26345.2 Exp number, first 60 AAs: 16.43186   |                                                                  |         |     |     |  |
| # BBK26345.2 Total prob of N-in: 0.00182          |                                                                  |         |     |     |  |
| # BBK26345.2 POSSIBLE N-term signal sequence      |                                                                  |         |     |     |  |
| BBK26345.2                                        | TMHMM2.0                                                         | outside | 1   | 44  |  |
| BBK26345.2                                        | TMHMM2.0                                                         | TMhelix | 45  | 67  |  |
| BBK26345.2                                        | TMHMM2.0                                                         | inside  | 68  | 79  |  |
| BBK26345.2                                        | TMHMM2.0                                                         | TMhelix | 80  | 102 |  |
| BBK26345.2                                        | TMHMM2.0                                                         | outside | 103 | 116 |  |
| BBK26345.2                                        | TMHMM2.0                                                         | TMhelix | 117 | 139 |  |
| BBK26345.2                                        | TMHMM2.0                                                         | inside  | 140 | 159 |  |
| BBK26345.2                                        | TMHMM2.0                                                         | TMhelix | 160 | 182 |  |
| BBK26345.2                                        | TMHMM2.0                                                         | outside | 183 | 205 |  |
| BBK26345.2                                        | TMHMM2.0                                                         | TMhelix | 206 | 228 |  |
| BBK26345.2                                        | TMHMM2.0                                                         | inside  | 229 | 290 |  |
| BBK26345.2                                        | TMHMM2.0                                                         | TMhelix | 291 | 313 |  |
| BBK26345.2                                        | TMHMM2.0                                                         | outside | 314 | 322 |  |
| BBK26345.2                                        | TMHMM2.0                                                         | TMhelix | 323 | 345 |  |
| BBK26345.2                                        | TMHMM2.0                                                         | inside  | 346 | 477 |  |
| ADRB2                                             | beta-2 adrenergic receptor [Gallus gallus] GenBank: BBK26353.1   |         |     |     |  |
| # BBK26353.1 Length: 397                          |                                                                  |         |     |     |  |
| # BBK26353.1 Number of predicted TMHs: 7          |                                                                  |         |     |     |  |
| # BBK26353.1 Exp number of AAs in TMHs: 153.64313 |                                                                  |         |     |     |  |
| # BBK26353.1 Exp number, first 60 AAs: 23.00243   |                                                                  |         |     |     |  |
| # BBK26353.1 Total prob of N-in: 0.00236          |                                                                  |         |     |     |  |
| # BBK26353.1 POSSIBLE N-term signal sequence      |                                                                  |         |     |     |  |
| BBK26353.1                                        | TMHMM2.0                                                         | outside | 1   | 28  |  |
| BBK26353.1                                        | TMHMM2.0                                                         | TMhelix | 29  | 51  |  |
| BBK26353.1                                        | TMHMM2.0                                                         | inside  | 52  | 63  |  |
| BBK26353.1                                        | TMHMM2.0                                                         | TMhelix | 64  | 86  |  |
| BBK26353.1                                        | TMHMM2.0                                                         | outside | 87  | 105 |  |
| BBK26353.1                                        | TMHMM2.0                                                         | TMhelix | 106 | 128 |  |
| BBK26353.1                                        | TMHMM2.0                                                         | inside  | 129 | 148 |  |
| BBK26353.1                                        | TMHMM2.0                                                         | TMhelix | 149 | 171 |  |
| BBK26353.1                                        | TMHMM2.0                                                         | outside | 172 | 194 |  |
| BBK26353.1                                        | TMHMM2.0                                                         | TMhelix | 195 | 217 |  |
| BBK26353.1                                        | TMHMM2.0                                                         | inside  | 218 | 268 |  |
| BBK26353.1                                        | TMHMM2.0                                                         | TMhelix | 269 | 291 |  |
| BBK26353.1                                        | TMHMM2.0                                                         | outside | 292 | 300 |  |
| BBK26353.1                                        | TMHMM2.0                                                         | TMhelix | 301 | 320 |  |
| BBK26353.1                                        | TMHMM2.0                                                         | inside  | 321 | 397 |  |

| ADRA2A                                            | alpha-2A adrenergic receptor [Gallus gallus] GenBank: BBK26327.2 |         |     |     |  |
|---------------------------------------------------|------------------------------------------------------------------|---------|-----|-----|--|
| # BBK26327.2 Length: 444                          |                                                                  |         |     |     |  |
| # BBK26327.2 Number of predicted TMHs: 7          |                                                                  |         |     |     |  |
| # BBK26327.2 Exp number of AAs in TMHs: 157.45425 |                                                                  |         |     |     |  |
| # BBK26327.2 Exp number, first 60 AAs: 1.74334    |                                                                  |         |     |     |  |
| # BBK26327.2 Total prob of N-in: 0.00113          |                                                                  |         |     |     |  |
| BBK26327.2                                        | TMHMM2.0                                                         | outside | 1   | 59  |  |
| BBK26327.2                                        | TMHMM2.0                                                         | TMhelix | 60  | 82  |  |
| BBK26327.2                                        | TMHMM2.0                                                         | inside  | 83  | 93  |  |
| BBK26327.2                                        | TMHMM2.0                                                         | TMhelix | 94  | 116 |  |
| BBK26327.2                                        | TMHMM2.0                                                         | outside | 117 | 130 |  |
| BBK26327.2                                        | TMHMM2.0                                                         | TMhelix | 131 | 153 |  |
| BBK26327.2                                        | TMHMM2.0                                                         | inside  | 154 | 173 |  |
| BBK26327.2                                        | TMHMM2.0                                                         | TMhelix | 174 | 196 |  |
| BBK26327.2                                        | TMHMM2.0                                                         | outside | 197 | 217 |  |
| BBK26327.2                                        | TMHMM2.0                                                         | TMhelix | 218 | 240 |  |
| BBK26327.2                                        | TMHMM2.0                                                         | inside  | 241 | 363 |  |
| BBK26327.2                                        | TMHMM2.0                                                         | TMhelix | 364 | 386 |  |
| BBK26327.2                                        | TMHMM2.0                                                         | outside | 387 | 400 |  |
| BBK26327.2                                        | TMHMM2.0                                                         | TMhelix | 401 | 423 |  |
| BBK26327.2                                        | TMHMM2.0                                                         | inside  | 424 | 444 |  |

|                                                   |                                                                  |         |     |     |  |
|---------------------------------------------------|------------------------------------------------------------------|---------|-----|-----|--|
| ADRA2B                                            | alpha-2B adrenergic receptor [Gallus gallus] GenBank: BBK26332.1 |         |     |     |  |
| # BBK26332.1 Length: 345                          |                                                                  |         |     |     |  |
| # BBK26332.1 Number of predicted TMHs: 7          |                                                                  |         |     |     |  |
| # BBK26332.1 Exp number of AAs in TMHs: 157.66834 |                                                                  |         |     |     |  |
| # BBK26332.1 Exp number, first 60 AAs: 23.0819    |                                                                  |         |     |     |  |
| # BBK26332.1 Total prob of N-in: 0.00002          |                                                                  |         |     |     |  |
| # BBK26332.1 POSSIBLE N-term signal sequence      |                                                                  |         |     |     |  |
| BBK26332.1                                        | TMHMM2.0                                                         | outside | 1   | 28  |  |
| BBK26332.1                                        | TMHMM2.0                                                         | TMhelix | 29  | 51  |  |
| BBK26332.1                                        | TMHMM2.0                                                         | inside  | 52  | 63  |  |
| BBK26332.1                                        | TMHMM2.0                                                         | TMhelix | 64  | 86  |  |
| BBK26332.1                                        | TMHMM2.0                                                         | outside | 87  | 100 |  |
| BBK26332.1                                        | TMHMM2.0                                                         | TMhelix | 101 | 123 |  |
| BBK26332.1                                        | TMHMM2.0                                                         | inside  | 124 | 143 |  |
| BBK26332.1                                        | TMHMM2.0                                                         | TMhelix | 144 | 164 |  |
| BBK26332.1                                        | TMHMM2.0                                                         | outside | 165 | 178 |  |
| BBK26332.1                                        | TMHMM2.0                                                         | TMhelix | 179 | 201 |  |
| BBK26332.1                                        | TMHMM2.0                                                         | inside  | 202 | 265 |  |
| BBK26332.1                                        | TMHMM2.0                                                         | TMhelix | 266 | 288 |  |
| BBK26332.1                                        | TMHMM2.0                                                         | outside | 289 | 302 |  |
| BBK26332.1                                        | TMHMM2.0                                                         | TMhelix | 303 | 325 |  |
| BBK26332.1                                        | TMHMM2.0                                                         | inside  | 326 | 345 |  |

|                                                   |                                                                |         |     |     |  |
|---------------------------------------------------|----------------------------------------------------------------|---------|-----|-----|--|
| ADRB3                                             | beta-3 adrenergic receptor [Gallus gallus] GenBank: BBK26359.1 |         |     |     |  |
| # BBK26359.1 Length: 437                          |                                                                |         |     |     |  |
| # BBK26359.1 Number of predicted TMHs: 7          |                                                                |         |     |     |  |
| # BBK26359.1 Exp number of AAs in TMHs: 151.94344 |                                                                |         |     |     |  |
| # BBK26359.1 Exp number, first 60 AAs: 25.32602   |                                                                |         |     |     |  |
| # BBK26359.1 Total prob of N-in: 0.10698          |                                                                |         |     |     |  |
| # BBK26359.1 POSSIBLE N-term signal sequence      |                                                                |         |     |     |  |
| BBK26359.1                                        | TMHMM2.0                                                       | outside | 1   | 33  |  |
| BBK26359.1                                        | TMHMM2.0                                                       | TMhelix | 34  | 56  |  |
| BBK26359.1                                        | TMHMM2.0                                                       | inside  | 57  | 68  |  |
| BBK26359.1                                        | TMHMM2.0                                                       | TMhelix | 69  | 91  |  |
| BBK26359.1                                        | TMHMM2.0                                                       | outside | 92  | 105 |  |
| BBK26359.1                                        | TMHMM2.0                                                       | TMhelix | 106 | 128 |  |
| BBK26359.1                                        | TMHMM2.0                                                       | inside  | 129 | 148 |  |
| BBK26359.1                                        | TMHMM2.0                                                       | TMhelix | 149 | 168 |  |
| BBK26359.1                                        | TMHMM2.0                                                       | outside | 169 | 197 |  |
| BBK26359.1                                        | TMHMM2.0                                                       | TMhelix | 198 | 220 |  |
| BBK26359.1                                        | TMHMM2.0                                                       | inside  | 221 | 271 |  |
| BBK26359.1                                        | TMHMM2.0                                                       | TMhelix | 272 | 294 |  |
| BBK26359.1                                        | TMHMM2.0                                                       | outside | 295 | 303 |  |
| BBK26359.1                                        | TMHMM2.0                                                       | TMhelix | 304 | 326 |  |
| BBK26359.1                                        | TMHMM2.0                                                       | inside  | 327 | 437 |  |





Table S7.  $N_{ST}$  population analysis data of ADRA1B.

| Site number |            | 33        | 123       | 387       | 480       | 663       | 773       | 867       | 1110      | 1480      |           |                 |                 |           |                  |         |    |                 |           |  |
|-------------|------------|-----------|-----------|-----------|-----------|-----------|-----------|-----------|-----------|-----------|-----------|-----------------|-----------------|-----------|------------------|---------|----|-----------------|-----------|--|
| ADRA1B      |            | 1         | 2         | 3         | 4         | 5         | 6         | 7         | 8         | 9         |           | ADRA1B          |                 |           |                  |         |    |                 |           |  |
|             | A          | 2         | 6         | 0         | 0         | 0         | 0         | 6         | 0         | 6         | 14        | 0.3333333       | 0.111111111     |           | A                | A       | 25 | 0.297619        | 0.0885771 |  |
|             |            | 0.3333333 | 1         | 0         | 0         | 0         | 0         | 1         | 0         | 1         | 0.3333333 | 0.333           |                 |           | T                | T       | 12 | 0.142857        | 0.0204082 |  |
|             | T          | 0         | 0         | 6         | 0         | 3         | 0         | 0         | 0         | 0         | 9         | 0.2142857       | 0.045918367     |           | T                | G       | 35 | 0.416667        | 0.1736111 |  |
|             |            | 0         | 0         | 1         | 0         | 0.5       | 0         | 0         | 0         | 0         | 0.2142857 | 0.2142          |                 |           | C                | C       | 12 | 0.142857        | 0.0204082 |  |
| Shamo       | G          | 4         | 0         | 0         | 6         | 0         | 6         | 0         | 6         | 0         | 16        | 0.3809524       | 0.145124717     |           | G                |         |    | 1               | 0.3030045 |  |
|             |            | 0.6666667 | 0         | 0         | 1         | 0         | 1         | 0         | 1         | 0         | 0.3809524 | 0.381           |                 |           | Total 1          |         | 84 | H <sub>ri</sub> | 0.6969955 |  |
|             | C          | 0         | 0         | 0         | 0         | 3         | 0         | 0         | 0         | 0         | 3         | 0.0714286       | 0.005102041     | 42        | C                | Total 2 | 84 |                 |           |  |
|             |            | 0         | 0         | 0         | 0         | 0.5       | 0         | 0         | 0         | 0         | 0.0714286 | 0.0714          |                 |           |                  |         |    |                 |           |  |
| Hs          |            | 1.000     | 1.000     | 1.000     | 1.000     | 1.000     | 1.000     | 1.000     | 1.000     | 1.000     | 1.000     | 1.000           | 0.307           | 0.693     | H <sub>sij</sub> |         |    |                 |           |  |
|             | Heterozygo | 0.444     | 0.000     | 0.000     | 0.000     | 0.500     | 0.000     | 0.000     | 0.000     | 0.000     | 0.1349206 | 0.135           | H <sub>si</sub> | 0.006     | N <sub>stj</sub> |         |    |                 |           |  |
|             |            |           |           |           |           |           |           |           |           |           |           |                 |                 |           |                  |         |    |                 |           |  |
| Chicken     | A          | 5         | 2         | 0         | 1         | 0         | 1         | 2         | 1         | 5         | 11        | 0.2619048       | 0.068594104     |           | A                |         |    |                 |           |  |
|             |            | 0.8333333 | 0.3333333 | 0         | 0.1666667 | 0         | 0.1666667 | 0.3333333 | 0.1666667 | 0.8333333 | 0.2619048 | 0.2619          |                 |           |                  |         |    |                 |           |  |
|             | T          | 0         | 0         | 2         | 0         | 1         | 0         | 0         | 0         | 0         | 3         | 0.0714286       | 0.005102041     |           | T                |         |    |                 |           |  |
|             |            | 0         | 0         | 0.3333333 | 0         | 0.1666667 | 0         | 0         | 0         | 0         | 0.0714286 | 0.0714          |                 |           |                  |         |    |                 |           |  |
|             | G          | 1         | 4         | 0         | 5         | 0         | 5         | 4         | 5         | 1         | 19        | 0.452381        | 0.204648526     |           | G                |         |    |                 |           |  |
|             |            | 0.1666667 | 0.6666667 | 0         | 0.8333333 | 0         | 0.8333333 | 0.6666667 | 0.8333333 | 0.1666667 | 0.452381  | 0.452           |                 |           |                  |         |    |                 |           |  |
|             | C          | 0         | 0         | 4         | 0         | 5         | 0         | 0         | 0         | 0         | 9         | 0.2142857       | 0.045918367     | 42        | C                |         |    |                 |           |  |
|             |            | 0         | 0         | 0.6666667 | 0         | 0.8333333 | 0         | 0         | 0         | 0         | 0.2142857 | 0.2142          |                 |           |                  |         |    |                 |           |  |
| Hs          |            | 1.000     | 1.000     | 1.000     | 1.000     | 1.000     | 1.000     | 1.000     | 1.000     | 1.000     | 1.000     | 1.000           | 0.3242630       | 0.6757370 | H <sub>sij</sub> |         |    |                 |           |  |
|             | Heterozygo | 0.278     | 0.444     | 0.444     | 0.278     | 0.278     | 0.278     | 0.444     | 0.278     | 0.278     | 0.349     | 0.349           | H <sub>si</sub> | 0.031     | N <sub>stj</sub> |         |    |                 |           |  |
|             |            |           |           |           |           |           |           |           |           |           |           |                 |                 |           |                  |         |    |                 |           |  |
|             |            |           |           |           |           |           |           |           |           |           |           | H <sub>ri</sub> |                 | 0.697     |                  |         |    |                 |           |  |

Table S8.  $N_{ST}$  population analysis data of ADRA1D.

| Site number |            | 173 216   |           | 213       | 612       | 1068      | 1179      | 1319  |           |           |             |           |         |
|-------------|------------|-----------|-----------|-----------|-----------|-----------|-----------|-------|-----------|-----------|-------------|-----------|---------|
| ADRA1D      | 1          | 2         | 3         |           | 4         | 5         | 6         | 7     |           | ADRA1D    |             |           |         |
| Shamo       | A          | 0         | 0         | 0         | 0         | 0         | 0         | 3     | 3         | 0.0714286 | 0.005102041 |           | A       |
|             |            | 0         | 0         | 0         | 0         | 0         | 0         | 0.5   | 0.0714286 | 0.071     |             |           | T       |
|             | T          | 5         | 0         | 0         | 0         | 3         | 0         | 0     | 8         | 0.1904762 | 0.036281179 |           | T       |
|             |            | 0.8333333 | 0         | 0         | 0         | 0.5       | 0         | 0     | 0.1904762 | 0.1905    |             |           | C       |
|             | G          | 1         | 0         | 0         | 0         | 0         | 3         | 0     | 4         | 0.0952381 | 0.009070295 |           | G       |
|             |            | 0.1666667 | 0         | 0         | 0         | 0         | 0.5       | 0     | 0.0952381 | 0.095     |             |           | Total 1 |
|             | C          | 0         | 6         | 6         | 6         | 3         | 3         | 3     | 27        | 0.6428571 | 0.413265306 | 42        | C       |
| Hs          |            | 0         | 1         | 1         | 1         | 0.5       | 0.5       | 0.5   | 0.6428571 | 0.643     |             |           | Total 2 |
|             |            | 1.000     | 1.000     | 1.000     | 1.000     | 1.000     | 1.000     | 1.000 | 1.000     | 1.000     | 0.464       | 0.536     | Hsij    |
|             | Heterozygo | 0.278     | 0.000     | 0.000     | 0.000     | 0.500     | 0.500     | 0.500 | 0.2539683 | 0.254     | Hsi         | -0.027    | NSTij   |
| Chicken     | A          | 0         | 0         | 0         | 0         | 0         | 0         | 0     | 0         | 0         | 0           |           | A       |
|             |            | 0         | 0         | 0         | 0         | 0         | 0         | 0     | 0         | 0         |             |           |         |
|             | T          | 6         | 1         | 1         | 2         | 5         | 0         | 0     | 15        | 0.3571429 | 0.12755102  |           | T       |
|             |            | 1         | 0.1666667 | 0.1666667 | 0.3333333 | 0.8333333 | 0         | 0     | 0.3571429 | 0.357     |             |           |         |
|             | G          | 0         | 0         | 0         | 0         | 0         | 1         | 0     | 1         | 0.0238095 | 0.000566893 |           | G       |
|             |            | 0         | 0         | 0         | 0         | 0         | 0.1666667 | 0     | 0.0238095 | 0.024     |             |           |         |
|             | C          | 0         | 5         | 5         | 4         | 1         | 5         | 6     | 26        | 0.6190476 | 0.383219955 | 42        | C       |
| Hs          |            | 0         | 0.8333333 | 0.8333333 | 0.6666667 | 0.1666667 | 0.8333333 | 1     | 0.6190476 | 0.619     |             |           |         |
|             |            | 1.000     | 1.000     | 1.000     | 1.000     | 1.000     | 1.000     | 1.000 | 1.000     | 1.000     | 0.5113379   | 0.4886621 | Hsij    |
|             | Heterozygo | 0.000     | 0.278     | 0.278     | 0.444     | 0.278     | 0.278     | 0.000 | 0.222     | 0.222     | Hsi         | 0.064     | NSTij   |
|             |            |           |           |           |           |           |           |       |           |           |             |           |         |
|             |            |           |           |           |           |           |           |       |           | HTi       |             | 0.522     |         |

Table S9. *N<sub>st</sub>* population analysis data of ADRA2A.

| ADRA2A  | Site number | 121       | 162       | 192       | 249       | 255       | 297       | 391       | 579   | 645       | 687       | 747       | 768       | 792       | 816       | 828       | 835       | 843       | 900       | 972       | 1035      | 1167      | 1224      |           | ADRA2A    |                 |           |                 |                 |     |                 |           |           |
|---------|-------------|-----------|-----------|-----------|-----------|-----------|-----------|-----------|-------|-----------|-----------|-----------|-----------|-----------|-----------|-----------|-----------|-----------|-----------|-----------|-----------|-----------|-----------|-----------|-----------|-----------------|-----------|-----------------|-----------------|-----|-----------------|-----------|-----------|
|         |             | 1         | 2         | 3         | 4         | 5         | 6         | 7         | 8     | 9         | 10        | 11        | 12        | 13        | 14        | 15        | 16        | 17        | 18        | 19        | 20        | 21        | 22        |           |           |                 |           |                 |                 |     |                 |           |           |
|         | A           | 5         | 0         | 0         | 2         | 0         | 3         | 0         | 0     | 0         | 2         | 0         | 2         | 0         | 0         | 3         | 1         | 0         | 1         | 3         | 3         | 0         | 0         |           | 25        | 0.1893939       | 0.0358701 |                 | A               | A   | 44              | 0.166667  | 0.0277778 |
|         |             | 0.8333333 | 0         | 0         | 0.3333333 | 0         | 0.5       | 0         | 0     | 0         | 0         | 0.3333333 | 0         | 0.3333333 | 0         | 0         | 0.5       | 0.1666667 | 0         | 0.1666667 | 0.5       | 0.5       | 0         | 0         | 0.1893939 | 0.189           |           | T               | T               | 48  | 0.181818        | 0.0330579 |           |
|         | T           | 0         | 2         | 0         | 0         | 3         | 0         | 3         | 0     | 4         | 0         | 2         | 0         | 0         | 5         | 0         | 0         | 0         | 0         | 0         | 0         | 4         | 0         | 23        | 0.1742424 | 0.0303604       |           | T               | G               | 61  | 0.231061        | 0.053389  |           |
|         |             | 0         | 0.3333333 | 0         | 0         | 0.5       | 0         | 0.5       | 0     | 0.6666667 | 0         | 0.3333333 | 0         | 0         | 0.8333333 | 0         | 0         | 0         | 0         | 0         | 0         | 0         | 0.6666667 | 0         | 0.1742424 | 0.174           |           | C               | C               | 111 | 0.420455        | 0.176782  |           |
| Shamo   | G           | 1         | 0         | 0         | 0         | 0         | 3         | 0         | 6     | 0         | 0         | 0         | 0         | 0         | 0         | 3         | 5         | 0         | 5         | 3         | 3         | 0         | 0         | 29        | 0.219697  | 0.0482668       |           | G               |                 |     |                 | 1         | 0.2910067 |
|         |             | 0.1666667 | 0         | 0         | 0         | 0         | 0.5       | 0         | 1     | 0         | 0         | 0         | 0         | 0         | 0         | 0.5       | 0.8333333 | 0         | 0.8333333 | 0.5       | 0.5       | 0         | 0         | 0.219697  | 0.22      |                 |           |                 | Total 1         | 264 | H <sub>st</sub> | 0.7089933 |           |
|         | C           | 0         | 4         | 6         | 4         | 3         | 0         | 3         | 0     | 2         | 4         | 4         | 4         | 6         | 1         | 0         | 0         | 6         | 0         | 0         | 0         | 2         | 6         | 55        | 0.4166667 | 0.1736111       | 132       | C               |                 |     | Total 2         | 264       |           |
|         |             | 0         | 0.6666667 | 1         | 0.6666667 | 0.5       | 0         | 0.5       | 0     | 0.3333333 | 0.6666667 | 0.6666667 | 0.6666667 | 1         | 0.1666667 | 0         | 0         | 1         | 0         | 0         | 0         | 0.3333333 | 1         | 0.4166667 | 0.417     |                 |           |                 |                 |     |                 |           |           |
| Hs      |             | 1.000     | 1.000     | 1.000     | 1.000     | 1.000     | 1.000     | 1.000     | 1.000 | 1.000     | 1.000     | 1.000     | 1.000     | 1.000     | 1.000     | 1.000     | 1.000     | 1.000     | 1.000     | 1.000     | 1.000     | 1.000     | 1.000     | 1.000     | 1.000     | 1.000           | 0.288     | 0.712           | H <sub>st</sub> |     |                 |           |           |
|         | Heterozygo  | 0.278     | 0.444     | 0.000     | 0.444     | 0.500     | 0.500     | 0.500     | 0.000 | 0.444     | 0.444     | 0.444     | 0.444     | 0.000     | 0.278     | 0.500     | 0.278     | 0.000     | 0.278     | 0.500     | 0.500     | 0.444     | 0.000     | 0.328     | 0.328     | H <sub>st</sub> | -0.004    | N <sub>st</sub> |                 |     |                 |           |           |
| Chicken |             |           |           |           |           |           |           |           |       |           |           |           |           |           |           |           |           |           |           |           |           |           |           |           |           |                 |           |                 |                 |     |                 |           |           |
|         | A           | 2         | 0         | 0         | 1         | 0         | 2         | 0         | 3     | 0         | 1         | 0         | 1         | 0         | 0         | 1         | 0         | 0         | 3         | 1         | 4         | 0         | 0         | 19        | 0.1439394 | 0.0207185       |           | A               |                 |     |                 |           |           |
|         |             | 0.3333333 | 0         | 0         | 0.1666667 | 0         | 0.3333333 | 0         | 0.5   | 0         | 0.1666667 | 0         | 0.1666667 | 0         | 0         | 0.1666667 | 0         | 0         | 0.5       | 0.1666667 | 0.6666667 | 0         | 0         | 0.1439394 | 0.1439    |                 |           |                 |                 |     |                 |           |           |
|         | T           | 0         | 0         | 1         | 0         | 2         | 0         | 2         | 0     | 3         | 0         | 3         | 0         | 2         | 4         | 0         | 0         | 2         | 0         | 0         | 0         | 3         | 3         | 25        | 0.1893939 | 0.0358701       |           | T               |                 |     |                 |           |           |
|         |             | 0         | 0         | 0.1666667 | 0         | 0.3333333 | 0         | 0.3333333 | 0     | 0.5       | 0         | 0.5       | 0         | 0.3333333 | 0.6666667 | 0         | 0         | 0.3333333 | 0         | 0         | 0         | 0.5       | 0.5       | 0.1893939 | 0.1893    |                 |           |                 |                 |     |                 |           |           |
|         | G           | 4         | 0         | 0         | 0         | 0         | 4         | 0         | 3     | 0         | 0         | 0         | 0         | 0         | 0         | 5         | 6         | 0         | 3         | 5         | 2         | 0         | 0         | 32        | 0.2424242 | 0.0587695       |           | G               |                 |     |                 |           |           |
| Hs      |             | 0.6666667 | 0         | 0         | 0         | 0         | 0.6666667 | 0         | 0.5   | 0         | 0         | 0         | 0         | 0         | 0         | 0.8333333 | 1         | 0         | 0.5       | 0.8333333 | 0.3333333 | 0         | 0         | 0.2424242 | 0.2424    |                 |           |                 |                 |     |                 |           |           |
|         | C           | 0         | 6         | 5         | 5         | 4         | 0         | 4         | 0     | 3         | 5         | 3         | 5         | 4         | 2         | 0         | 0         | 4         | 0         | 0         | 0         | 3         | 3         | 56        | 0.4242424 | 0.1799816       | 132       | C               |                 |     |                 |           |           |
|         |             | 0         | 1         | 0.8333333 | 0.8333333 | 0.6666667 | 0         | 0.6666667 | 0     | 0.5       | 0.8333333 | 0.5       | 0.8333333 | 0.6666667 | 0.3333333 | 0         | 0         | 0.6666667 | 0         | 0         | 0         | 0.5       | 0.5       | 0.4242424 | 0.424     |                 |           |                 |                 |     |                 |           |           |
|         |             | 1.000     | 1.000     | 1.000     | 1.000     | 1.000     | 1.000     | 1.000     | 1.000 | 1.000     | 1.000     | 1.000     | 1.000     | 1.000     | 1.000     | 1.000     | 1.000     | 1.000     | 1.000     | 1.000     | 1.000     | 1.000     | 1.000     | 1.000     | 1.000     | 1.000           | 0.2953398 | 0.7046602       | H <sub>st</sub> |     |                 |           |           |
|         | Heterozygo  | 0.444     | 0.000     | 0.278     | 0.278     | 0.444     | 0.444     | 0.444     | 0.500 | 0.500     | 0.278     | 0.500     | 0.278     | 0.444     | 0.444     | 0.278     | 0.000     | 0.444     | 0.500     | 0.278     | 0.444     | 0.500     | 0.500     | 0.374     | 0.374     | H <sub>st</sub> | 0.006     | N <sub>st</sub> |                 |     |                 |           |           |
|         |             |           |           |           |           |           |           |           |       |           |           |           |           |           |           |           |           |           |           |           |           |           |           |           |           |                 |           |                 |                 |     |                 |           |           |

H<sub>T</sub> 0.709

Table S10. *N<sub>sr</sub>* population analysis data of ADRA2B.

| ADRa2B  | Site number | 390       | 411       | 413       | 537       | 629       | 636       | 702       | 717   | 874       | 987       |           | ADRa2B    |             |           |             |         |             |           |           |
|---------|-------------|-----------|-----------|-----------|-----------|-----------|-----------|-----------|-------|-----------|-----------|-----------|-----------|-------------|-----------|-------------|---------|-------------|-----------|-----------|
|         |             | 1         | 2         | 3         | 4         | 5         | 6         | 7         | 8     | 9         | 10        |           |           |             |           |             |         |             |           |           |
| ADRa2B  | A           | 2         | 1         | 1         | 4         | 1         | 0         | 0         | 0     | 2         | 0         | 11        | 0.1833333 | 0.033611111 |           | A           | A       | 22          | 0.183333  | 0.0336111 |
|         |             | 0.3333333 | 0.1666667 | 0.1666667 | 0.6666667 | 0.1666667 | 0         | 0         | 0     | 0.3333333 | 0         | 0.1833333 | 0.183     |             |           | T           | T       | 6           | 0.05      | 0.0025    |
|         | T           | 0         | 0         | 0         | 0         | 0         | 0         | 0         | 0     | 0         | 0         | 0         | 0         | 0           | 0         | T           | G       | 74          | 0.616667  | 0.3802778 |
|         |             | 0         | 0         | 0         | 0         | 0         | 0         | 0         | 0     | 0         | 0         | 0         | 0         |             |           | C           | C       | 18          | 0.15      | 0.0225    |
| Shamo   | G           | 4         | 5         | 5         | 2         | 5         | 0         | 6         | 6     | 4         | 0         | 37        | 0.6166667 | 0.380277778 |           | G           |         |             | 1         | 0.4388889 |
|         |             | 0.6666667 | 0.8333333 | 0.8333333 | 0.3333333 | 0.8333333 | 0         | 1         | 1     | 0.6666667 | 0         | 0.6166667 | 0.6166    |             |           | Total_1     | 120     | <i>H Ti</i> | 0.5611111 |           |
|         | C           | 0         | 0         | 0         | 0         | 0         | 6         | 0         | 0     | 0         | 6         | 12        | 0.2       | 0.04        | 60        | C           | Total_2 | 120         |           |           |
|         |             | 0         | 0         | 0         | 0         | 0         | 1         | 0         | 0     | 0         | 1         | 0.2       | 0.2       |             |           |             |         |             |           |           |
| Hs      |             | 1.000     | 1.000     | 1.000     | 1.000     | 1.000     | 1.000     | 1.000     | 1.000 | 1.000     | 1.000     | 1.000     | 1.000     | 0.454       | 0.546     | <i>Hsij</i> |         |             |           |           |
|         | Heterozygo  | 0.4444444 | 0.2777778 | 0.2777778 | 0.4444444 | 0.2777778 | 0         | 0         | 0     | 0.4444444 | 0         | 0.2407407 | 0.241     | <i>H Si</i> | 0.027     | <i>Nsrj</i> |         |             |           |           |
|         |             |           |           |           |           |           |           |           |       |           |           |           |           |             |           |             |         |             |           |           |
| Chicken | A           | 1         | 0         | 0         | 5         | 0         | 0         | 2         | 3     | 0         | 0         | 11        | 0.1833333 | 0.033611111 |           | A           |         |             |           |           |
|         |             | 0.1666667 | 0         | 0         | 0.8333333 | 0         | 0         | 0.3333333 | 0.5   | 0         | 0         | 0.2037037 | 0.204     |             |           |             |         |             |           |           |
|         | T           | 0         | 0         | 0         | 0         | 0         | 2         | 0         | 0     | 0         | 4         | 6         | 0.1       | 0.01        |           | T           |         |             |           |           |
|         |             | 0         | 0         | 0         | 0         | 0         | 0.3333333 | 0         | 0     | 0         | 0.6666667 | 0.037037  | 0.037     |             |           |             |         |             |           |           |
|         | G           | 5         | 6         | 6         | 1         | 6         | 0         | 4         | 3     | 6         | 0         | 37        | 0.6166667 | 0.380277778 |           | G           |         |             |           |           |
|         |             | 0.8333333 | 1         | 1         | 0.1666667 | 1         | 0         | 0.6666667 | 0.5   | 1         | 0         | 0.6851852 | 0.685     |             |           |             |         |             |           |           |
|         | C           | 0         | 0         | 0         | 0         | 0         | 4         | 0         | 0     | 0         | 2         | 6         | 0.1       | 0.01        | 60        | C           |         |             |           |           |
|         |             | 0         | 0         | 0         | 0         | 0         | 0.6666667 | 0         | 0     | 0         | 0.3333333 | 0.0740741 | 0.074     |             |           |             |         |             |           |           |
| Hs      |             | 1.000     | 1.000     | 1.000     | 1.000     | 1.000     | 1.000     | 1.000     | 1.000 | 1.000     | 1.000     | 1.000     | 1.000     | 0.4338889   | 0.5661111 | <i>Hsij</i> |         |             |           |           |
|         | Heterozygo  | 0.278     | 0.000     | 0.000     | 0.278     | 0.000     | 0.444     | 0.444     | 0.500 | 0.000     | 0.444     | 0.216     | 0.216     | <i>H Si</i> | -0.009    | <i>Nsrj</i> |         |             |           |           |
|         |             |           |           |           |           |           |           |           |       |           |           |           |           |             |           |             |         |             |           |           |
|         |             |           |           |           |           |           |           |           |       |           |           |           |           | <i>H Ti</i> | 0.561     |             |         |             |           |           |

Table S11.  $N_{ST}$  population analysis data of ADRB1.

| Site number |   | 492       | 874       | 1200      | 1208      | 1328      | 1330      | 1334      | 1396      |            |            |             |           |            |
|-------------|---|-----------|-----------|-----------|-----------|-----------|-----------|-----------|-----------|------------|------------|-------------|-----------|------------|
|             |   | 1         | 2         | 3         | 4         | 5         | 6         | 7         | 8         |            |            |             |           |            |
| ADRB1       | A | 0         | 0         | 0         | 6         | 2         | 0         | 4         | 0         | 12         | 0.25       | 0.0625      |           | A          |
|             |   | 0         | 0         | 0         | 1         | 0.3333333 | 0         | 0.6666667 | 0         | 0.25       | 0          |             |           | T          |
|             | T | 0         | 6         | 0         | 0         | 0         | 0         | 0         | 4         | 10         | 0.20833333 | 0.043402778 |           | T          |
| Shamo       |   | 0         | 1         | 0         | 0         | 0         | 0         | 0         | 0.6666667 | 0.20833333 | 0          |             |           | C          |
|             | G | 0         | 0         | 6         | 0         | 4         | 6         | 2         | 0         | 18         | 0.375      | 0.140625    |           | G          |
|             |   | 0         | 0         | 1         | 0         | 0.6666667 | 1         | 0.3333333 | 0         | 0.375      | 0          |             |           |            |
| Hs          | C | 6         | 0         | 0         | 0         | 0         | 0         | 0         | 2         | 8          | 0.16666667 | 0.027777778 | 48        | C          |
|             |   | 1         | 0         | 0         | 0         | 0         | 0         | 0         | 0.3333333 | 0.16666667 | 0          |             |           |            |
|             |   | 1.000     | 1.000     | 1.000     | 1.000     | 1.000     | 1.000     | 1.000     | 1.000     | 1.000      | 1.000      | 0.274       | 0.726     | $H_{Sij}$  |
| Heterozygo  |   | 0         | 0         | 0         | 0         | 0.444     | 0.000     | 0.444     | 0.444     | 0.16666667 | 0.222      | $H_{Si}$    | -0.003    | $N_{STij}$ |
|             |   |           |           |           |           |           |           |           |           |            |            |             |           |            |
| Chicken     | A | 0         | 0         | 2         | 2         | 6         | 1         | 0         | 0         | 11         | 0.22916667 | 0.052517361 |           | A          |
|             |   | 0         | 0         | 0.3333333 | 0.3333333 | 1         | 0.1666667 | 0         | 0         | 0.22916667 | 0          |             |           |            |
|             | T | 2         | 5         | 0         | 0         | 0         | 0         | 0         | 0         | 7          | 0.14583333 | 0.021267361 |           | T          |
| Hs          |   | 0.3333333 | 0.8333333 | 0         | 0         | 0         | 0         | 0         | 0         | 0.14583333 | 0          |             |           |            |
|             | G | 0         | 0         | 4         | 4         | 0         | 5         | 6         | 0         | 19         | 0.39583333 | 0.156684028 |           | G          |
|             |   | 0         | 0         | 0.6666667 | 0.6666667 | 0         | 0.8333333 | 1         | 0         | 0.39583333 | 0          |             |           |            |
| Hs          | C | 4         | 1         | 0         | 0         | 0         | 0         | 0         | 6         | 11         | 0.22916667 | 0.052517361 | 48        | C          |
|             |   | 0.6666667 | 0.1666667 | 0         | 0         | 0         | 0         | 0         | 1         | 0.22916667 | 0          |             |           |            |
|             |   | 1.000     | 1.000     | 1.000     | 1.000     | 1.000     | 1.000     | 1.000     | 1.000     | 1.000      | 1.000      | 0.2829861   | 0.7170139 | $H_{Sij}$  |
| Heterozygo  |   | 0.444     | 0.278     | 0.444     | 0.444     | 0.000     | 0.278     | 0.000     | 0.000     | 0.23611111 | 0.239      | $H_{Si}$    | 0.009     | $N_{STij}$ |
|             |   |           |           |           |           |           |           |           |           |            |            |             |           |            |

$H_{Ti}$  0.724

Table S12.  $N_{ST}$  population analysis data of ADRB2.

| Site number |    | 43         | 131       | 132       | 612       | 624       | 648       | 695       | 830       | 882       |           |           |             |             |               |               |     |             |           |  |
|-------------|----|------------|-----------|-----------|-----------|-----------|-----------|-----------|-----------|-----------|-----------|-----------|-------------|-------------|---------------|---------------|-----|-------------|-----------|--|
| ADRB2       |    | 1          | 2         | 3         | 4         | 5         | 6         | 7         | 8         | 9         |           | ADRB2     |             |             |               |               |     |             |           |  |
| Shamo       | A  | 2          | 0         | 0         | 0         | 0         | 0         | 4         | 0         | 0         | 6         | 0.1111111 | 0.012345679 |             | A             | A             | 12  | 0.111111    | 0.0123457 |  |
|             |    | 0.3333333  | 0         | 0         | 0         | 0         | 0         | 0.6666667 | 0         | 0         | 0.1111111 | 0.11      |             |             | T             | T             | 29  | 0.268519    | 0.0721022 |  |
|             | T  | 0          | 2         | 4         | 2         | 4         | 2         | 0         | 1         | 0         | 15        | 0.2777778 | 0.077160494 |             | T             | G             | 12  | 0.111111    | 0.0123457 |  |
|             |    | 0          | 0.3333333 | 0.6666667 | 0.3333333 | 0.6666667 | 0.3333333 | 0         | 0.1666667 | 0         | 0.2777778 | 0.28      |             |             | C             | C             | 55  | 0.509259    | 0.259345  |  |
|             | G  | 4          | 0         | 0         | 0         | 0         | 0         | 2         | 0         | 0         | 6         | 0.1111111 | 0.012345679 |             | G             |               |     | 1           | 0.3561385 |  |
|             |    | 0.6666667  | 0         | 0         | 0         | 0         | 0         | 0.3333333 | 0         | 0         | 0.1111111 | 0.11      |             |             | Total         | Total         | 108 | H <i>ri</i> | 0.6438615 |  |
|             | C  | 0          | 4         | 2         | 4         | 2         | 4         | 0         | 5         | 6         | 27        | 0.5       | 0.25        | 54          | C             | Total         | 108 |             |           |  |
|             |    | 0          | 0.6666667 | 0.3333333 | 0.6666667 | 0.3333333 | 0.6666667 | 0         | 0.8333333 | 1         | 0.5       | 0.5       |             |             |               |               |     |             |           |  |
|             |    | 1.000      | 1.000     | 1.000     | 1.000     | 1.000     | 1.000     | 1.000     | 1.000     | 1.000     | 1.000     | 1.000     | 0.352       | 0.648       | H <i>sj</i>   |               |     |             |           |  |
|             | Hs | Heterozygo | 0.4444444 | 0.4444444 | 0.4444444 | 0.4444444 | 0.4444444 | 0.4444444 | 0.4444444 | 0.2777778 | 0         | 0.3765432 | 0.377       | H <i>si</i> | -0.007        | N <i>stij</i> |     |             |           |  |
|             |    |            |           |           |           |           |           |           |           |           |           |           |             |             |               |               |     |             |           |  |
| Chicken     | A  | 0          | 0         | 0         | 0         | 0         | 0         | 6         | 0         | 0         | 6         | 0.1111111 | 0.012345679 |             | A             |               |     |             |           |  |
|             |    | 0          | 0         | 0         | 0         | 0         | 0         | 1         | 0         | 0         | 0.1111111 | 0.11      |             |             |               |               |     |             |           |  |
|             | T  | 0          | 0         | 6         | 0         | 6         | 0         | 0         | 0         | 2         | 14        | 0.2592593 | 0.067215364 |             | T             |               |     |             |           |  |
|             |    | 0          | 0         | 1         | 0         | 1         | 0         | 0         | 0         | 0.3333333 | 0.2592593 | 0.26      |             |             |               |               |     |             |           |  |
|             | G  | 6          | 0         | 0         | 0         | 0         | 0         | 0         | 0         | 0         | 6         | 0.1111111 | 0.012345679 |             | G             |               |     |             |           |  |
|             |    | 1          | 0         | 0         | 0         | 0         | 0         | 0         | 0         | 0         | 0.1111111 | 0.11      |             |             |               |               |     |             |           |  |
|             | C  | 0          | 6         | 0         | 6         | 0         | 6         | 0         | 6         | 4         | 28        | 0.5185185 | 0.268861454 | 54          | C             |               |     |             |           |  |
|             |    | 0          | 1         | 0         | 1         | 0         | 1         | 0         | 1         | 0.6666667 | 0.5185185 | 0.52      |             |             |               |               |     |             |           |  |
|             |    | 1.000      | 1.000     | 1.000     | 1.000     | 1.000     | 1.000     | 1.000     | 1.000     | 1.000     | 1.000     | 1.000     | 0.3607682   | 0.6392318   | H <i>sj</i>   |               |     |             |           |  |
|             | Hs | Heterozygo | 0.000     | 0.000     | 0.000     | 0.000     | 0.000     | 0.000     | 0.000     | 0.444     | 0.049     | 0.049     | H <i>si</i> | 0.007       | N <i>stij</i> |               |     |             |           |  |
|             |    |            |           |           |           |           |           |           |           |           |           |           |             |             |               |               |     |             |           |  |
|             |    |            |           |           |           |           |           |           |           |           |           |           | H <i>ti</i> | 0.644       |               |               |     |             |           |  |
